1

2 **Vaccine effectiveness of primary and booster COVID-19 vaccinations against SARS-CoV-2**  
3 **infection in the Netherlands from 12 July 2021 to 6 June 2022: a prospective cohort study**

4

5 Anne J. Huiberts (1), Brechje de Gier (1), Christina E. Hoeve (1), Hester E. de Melker (1), Susan J.M.  
6 Hahné (1), Gerco den Hartog (1), Diederick E. Grobbee (2), Janneke H.H.M. van de Wijgert (1,2),  
7 Susan van den Hof (1), Mirjam J. Knol (1)

8

9

- 10 1. Centre for Infectious Disease Control, National Institute for Public Health and Environment  
11 (RIVM), Bilthoven, the Netherlands  
12 2. Julius Center for Health Sciences and Primary Care, University Medical Center Utrecht  
13 (UMCU), Utrecht, the Netherlands

14

15

16 **Abstract word count:** 249

17 **Manuscript word count:** 3,937

18

19

20 **Corresponding author**

21 Mirjam J. Knol, Centre for Infectious Disease Control Netherlands, National Institute for Public Health  
22 and the Environment (RIVM), Antonie van Leeuwenhoeklaan 9, 3721 MA Bilthoven, the Netherlands

23 E-mail: [mirjam.knol@rivm.nl](mailto:mirjam.knol@rivm.nl)

24 **Keywords**

25 COVID-19, SARS-CoV-2, vaccine effectiveness

26

27 **Running title**

28 Effectiveness of COVID-19 vaccinations

29

30 **Summary**

31 This prospective cohort study contributes to vaccine policy of COVID-19 by showing the benefit of

32 booster vaccination in preventing SARS-CoV-2 infections, also in risk groups in which protection was

33 generally lower, although the additional protection was rather short-lived.

34

35 **List of abbreviations**

36 BEBO – Beoordeling Ethiek Biomedisch Onderzoek

37 CIMS – COVID-19 vaccination Information and Monitoring System

38 Ig - immunoglobulin

39 N – nucleocapsid protein

40 RIVM – National Institute of Public Health and the Environment

41 VASCO – VAccine Study COvid-19

42 VE – vaccine effectiveness

43 WHO – World Health Organization

44

45 **Abstract**

46 **Introduction** – Monitoring of COVID-19 vaccine effectiveness (VE) is needed to inform vaccine policy.

47 We estimated VE of primary vaccination, and first and second booster vaccination, against SARS-

48 CoV-2 infection overall, and in four risk groups defined by age and medical risk condition, in the

49 Delta and Omicron BA.1/BA.2 periods.

50 **Methods** – VASCO is an ongoing prospective cohort study among vaccinated and unvaccinated

51 Dutch adults. The primary endpoint was a self-reported positive SARS-CoV-2 test during 12 July

52 2021-6 June 2022. Participants with a prior SARS-CoV-2 infection, based on a positive test or

53 serology, were excluded. We used Cox proportional hazard models with vaccination status as time-

54 varying exposure and adjustment for age, sex, educational level, and medical risk condition. We

55 stratified by Delta and Omicron BA.1/BA.2 periods, risk group, and time since vaccination.

56 **Results** – 37,170 participants (mean age 57 years) were included. In the Delta period, VE <6 weeks

57 after primary vaccination was 80% (95%CI 69-87) and decreased to 71% (65-77) after 6 months. VE

58 increased to 96% (86-99) shortly after the first booster vaccination. In the Omicron period these

59 estimates were 46% (22-63), 25% (8-39) and 57% (52-62), respectively. VE was 50% (34-62) <6 weeks

60 after a second booster vaccination in participants aged  $\geq 60$  years. For the Omicron period, an

61 interaction term between vaccination status and risk group significantly improved the model

62 ( $p < 0.001$ ), with generally lower VEs for those with a medical risk condition.

63 **Conclusions** – Our results show the benefit of booster vaccinations against infection, also in risk

64 groups, although the additional protection wanes quite rapidly.

65

## 66 **Introduction**

67 After implementation of a vaccination program, real world vaccine effectiveness should be  
68 monitored to inform further vaccination policy [1]. The COVID-19 vaccination program in the  
69 Netherlands started on 6 January 2021. By 18 April 2021, four different COVID-19 vaccines had been  
70 approved and were used in the initial vaccination programme: Comirnaty (BNT162b2;  
71 BioNTech/Pfizer, Mainz, Germany/New York, United States (US)), Spikevax (mRNA-1273, Moderna,  
72 Cambridge, US), Vaxzevria (ChAdOx1-S; AstraZeneca, Cambridge, United Kingdom), and Jcovden  
73 (Ad26.COVS2-S (recombinant), Janssen-Cilag International NV, Beerse, Belgium). Different vaccines  
74 were recommended and administered in varying age groups [2, 3]. The first booster campaign for  
75 adults was initiated on 18 November 2021, prioritizing health care workers and those  $\geq 60$  years. By  
76 June 2022, a primary series coverage of 83% and a booster vaccination coverage of 64% of the Dutch  
77 population  $\geq 18$  years had been reached [4]. From 4 March 2022, a second booster vaccination was  
78 offered to adults  $\geq 60$  years, and uptake was relatively low (44% by June 2022) [5].

79 Since the start of the vaccination programme, various new SARS-CoV-2 variants of concern emerged,  
80 including the Delta (B.1.617.2) and Omicron (B.1.1.529) variants. The Delta variant was first detected  
81 in the Netherlands in April 2021 and replaced the Alpha variant as the dominant strain in July 2021  
82 [6]. The Omicron variant was first detected in late November 2021 and caused 90% of the infections  
83 six weeks later.

84 As in other countries, nationwide COVID-19 surveillance data in the Netherlands including testing  
85 and contact tracing data have been used to monitor and evaluate VE against SARS-CoV-2 infections  
86 [7-9]. The advantages of using national surveillance data are the large sample size and data  
87 availability in real-time. The disadvantages are dependence on testing infrastructure and testing  
88 behaviour. For example, the Dutch government scaled down free-of-charge testing at community  
89 test centers from 11 April 2022 onwards; the general public was encouraged to self-test when  
90 having symptoms from that date onwards.

91 The VAccine Study COvid-19 (VASCO) is a large population-based prospective cohort study that was  
92 initiated during the COVID-19 vaccination roll-out in the Netherlands enabled us to study vaccine-  
93 effectiveness irrespective of available registration data [10]. Both vaccinated and unvaccinated  
94 Dutch adults are followed for a five-year period during which extensive data, including  
95 demographics, vaccination data, and positive (self-)tests, are being collected from participants using  
96 regular online questionnaires.

97 Here we report on the VE of primary vaccination by any of the four available COVID-19 vaccines, as  
98 well as first and second booster vaccination, against self-reported SARS-CoV-2 infection by time  
99 since vaccination and in four subpopulations defined by age and medical risk condition, during 12  
100 July 2021 to 6 June 2022, the period in which the Delta and Omicron BA.1 and BA.2 variants were  
101 sequentially dominant.

102

## 103 **Methods**

### 104 Study design and study population

105 VASCO is an ongoing population-based prospective cohort study with five-year follow-up [10]. The  
106 study was initiated during the roll-out of the COVID-19 vaccination program in the Netherlands.  
107 Between 3 May 2021 and 15 December 2021, 45,552 community-dwelling adults aged 18 to 85 years  
108 were included. Participants had to be able to understand Dutch, as all study materials were written  
109 in Dutch, and were included irrespective of their COVID-19 vaccination status or intention to get  
110 vaccinated. Participants were asked to complete monthly online questionnaires in the first year, and  
111 three-monthly online questionnaires in years 2-5, including questions on sociodemographic factors,  
112 health status, COVID-19 vaccination, SARS-CoV-2-related symptoms, testing results, and test  
113 intention. At inclusion, 6 and 12 months after inclusion, and one month after primary vaccination,  
114 participants were asked to take a self-collected fingerprick blood sample at home. Samples were  
115 tested for SARS-CoV-2 antibodies by Elecsys Anti-SARS-CoV-2 immunoassay (Roche Diagnostics,

116 Vienna, Austria) using the NIBSC 20/136 WHO standard for quantification. In the current analysis,  
117 serology data were used to identify participants who had had a SARS-CoV-2 infection prior to the  
118 study period by determining the presence of immunoglobulin (Ig) antibodies against the SARS-CoV-2  
119 nucleocapsid protein (anti-N). Written informed consent was obtained from all participants prior to  
120 enrollment into the study. The VASCO study is conducted in accordance with the principles of the  
121 Declaration of Helsinki and the study protocol was approved by the not-for-profit independent  
122 Medical Ethics Committee of the *Stichting Beoordeling Ethiek Biomedisch Onderzoek* (BEBO), Assen,  
123 the Netherlands).

124

#### 125 Vaccination status

126 Self-reported vaccination data were linked to vaccination data registered in the Dutch national  
127 COVID-19 vaccination Information and Monitoring System (CIMS) [3]. Vaccination data from the  
128 CIMS registry were considered the primary source, except when the participant did not provide  
129 informed consent for vaccination registration in CIMS or for linking study and CIMS data. If CIMS  
130 and/or self-reported data were incomplete, data from both sources were combined (see **Additional**  
131 **file 1 and Table S1** for a detailed description). Vaccination status was categorized as unvaccinated  
132 (no vaccination received), primary vaccination series received (one dose of Jcovden 28+ days ago, or  
133 two doses of Vaxzevria, Comirnaty or Spikevax 14+ days ago), primary vaccination series and one  
134 booster received (primary vaccination series + one additional dose 7+ days ago), or primary  
135 vaccination series and two boosters received (primary vaccination series + two additional doses 7+  
136 days ago) [2, 3]. For individuals with a severe immune deficiency primary vaccination consisted of  
137 three doses. Therefore, a third dose administered before the start of the general public booster  
138 campaign (18 November 2021) was considered an additional primary series vaccination and not a  
139 booster vaccination. A second booster vaccination in the spring of 2022 was only available for  
140 individuals aged 60 years and above and some highly vulnerable groups. The 7, 14 or 28 person-days

141 between vaccine administration and obtained vaccination status were excluded because we  
142 assumed that immunity was not yet fully established. Participants were excluded if they reported to  
143 have received more doses than possible according to the Dutch vaccination strategy [2].

144

#### 145 SARS-CoV-2 infections

146 The primary endpoint was a self-reported positive SARS-CoV-2 test. Participants were asked to notify  
147 all positive SARS-CoV-2 tests via the study website or app (either a test by a community testing  
148 center free-of-charge, a test at a commercial test center, or a self-administered antigen-test).  
149 Community testing was scaled down from 11 April 2022 onwards. To facilitate testing after that date  
150 in case of symptoms associated with COVID-19 and/or contact with a person infected with SARS-  
151 CoV-2, the study team provided self-tests to participants from May 2022 onwards. Participants could  
152 report positive tests in real time, and in addition, each scheduled follow-up questionnaire contained  
153 questions regarding recent positive SARS-CoV-2 tests. Reported infections were considered Delta  
154 infections if the positive test date was between 12 July 2021 and 19 December 2021, the period in  
155 which >90% of the cases was caused by the Delta variant [11]. Reported positive tests from 10  
156 January 2022 until 6 June 2022 were attributed to the Omicron BA.1 or BA.2 variant. Participants  
157 who had reported a positive test or tested positive for N-antibodies prior to start of follow-up in the  
158 current analysis were excluded from the analysis in order to estimate effects of vaccination only.

159

#### 160 Covariates

161 Sociodemographic data such as age and sex were collected at baseline and during follow-up.  
162 Educational level was classified as low (no education or primary education), intermediate (secondary  
163 school or vocational training), or high (bachelor's degree, university). A medical risk condition was  
164 present when a participant reported to have one or more of the following conditions: diabetes

165 mellitus, lung disease or asthma, asplenia, cardiovascular disease, immune deficiency, cancer  
166 (currently untreated but treated in the past, currently treated, untreated), liver disease, neurological  
167 disease, renal disease, organ or bone marrow transplantation. Four risk groups were defined by age  
168 (18-59 and 60-85 years) and presence of a medical risk condition (present or absent).

169

#### 170 Statistical analyses

171 Data were inspected using descriptive statistics and graphical displays. Cox proportional hazard  
172 models were used to estimate VE of primary series, and first and second booster vaccination against  
173 SARS-CoV-2 infection in the Delta and Omicron BA.1/BA.2 period. Vaccination status was included as  
174 a time-varying exposure. Participants entered the study at the start of the study period (12 July  
175 2021) or the date of completion of the baseline questionnaire, if they became a participant later  
176 than 12 July 2021. Participants were followed until the date of the first reported positive test. If no  
177 positive test was reported, participants were followed until the most recent questionnaire  
178 completion date plus the median time between follow-up questionnaires for that participant (to  
179 include only person-time in which participants were assumed to be active), or the end date of the  
180 study period (6 June 2022), whichever came first. Median time between follow-up questionnaires  
181 was determined per person and separately for the first year in which participants received monthly  
182 questionnaires, and after year 1 when they received questionnaires every three months. Calendar  
183 time was used as the underlying timescale for the Cox regression. This effectively means that at each  
184 date participants with different vaccination statuses were compared, thereby adjusting for factors  
185 changing over time during the pandemic, i.e. infection pressure, and the number of vaccinated  
186 persons in the population. Potential violation of assumptions regarding proportional hazards was  
187 checked using graphical diagnostics based on the scaled Schoenfeld residuals.

188 Models were stratified by Delta and Omicron periods and by time since start of the vaccination  
189 status in 6-week intervals. Analyses were first adjusted for sex, educational level, and age group, and



190 then additionally for the presence of a medical risk condition. Age group and the presence of a  
191 medical risk condition were included as time-varying confounders. Risk group membership based on  
192 age (18-59 and 60-85 years) and medical risk condition (present or absent) was examined as a  
193 potential effect modifier by extending the model with an interaction term and by stratified analysis.  
194 As sensitivity analyses, analyses were repeated in two specific subpopulation. The first sensitivity  
195 analysis was done in participants who reported to (almost) always test for SARS-CoV-2 infection in  
196 case of SARS-CoV-2 related symptoms. Secondly, the analysis was repeated in participants who had  
197 received only Comirnaty vaccine doses versus unvaccinated participants. We also present VE  
198 estimates of the primary vaccination series stratified by vaccine product (Comirnaty, Spikevax,  
199 Vaxzevria and Jcovden) and VE estimates of first booster vaccination stratified by vaccine product of  
200 the booster (Comirnaty or Spikevax) and primary vaccination series (mRNA vaccine or Vaxzevria).  
201 Vaccine effectiveness was calculated as  $100\% \times (1 - \text{hazard ratio})$ . All statistical analyses were  
202 performed in statistical package R version 4.1.3, using packages Epi and survival.

203

## 204 **Results**

### 205 Study population

206 Of the 45,049 VASCO participants participating (partly) during the study period, 121 participants  
207 were excluded because of having had a first and/or second booster vaccination before the start of  
208 that particular booster campaign. Additionally, 40 participants were excluded because of missing  
209 covariates and 255 participants did not add person-time to one of the studied vaccination status  
210 strata, e.g. entered the study when already having received a first vaccination but never completed  
211 primary vaccination series (not applicable to Jcovden). Of the 44,633 remaining participants, 6,826  
212 participants (15.3%) reported to have had a positive SARS-CoV-2 test prior to start of follow-up in  
213 the current analysis. Additionally, 991 (2.2%) tested positive for SARS-CoV-2 anti-N antibodies prior

214 to start of follow-up. Consequently, 36,816 participants were included in the analyses (**Table 1**). The  
215 age of the participants at inclusion ranged between 18 and 85 years, with a median age of 61 years.  
216 More women (62%) than men were included, and 57% of the participants was highly educated. At  
217 the start of the study period, 12,152 participants were included in the study, of which 11,908  
218 (98.0%) had completed their primary vaccination series, and 244 (2.0%) were unvaccinated  
219 (**Additional file 1, Figure S1**). At the start of the Omicron period, the cohort consisted of 27,646  
220 active participants. Of those, 3,802 (13.8%) participants had only completed their primary  
221 vaccination series, 23,352 (84.5%) participants had additionally received a first booster vaccination,  
222 and 492 (1.8%) participants were unvaccinated. Of all participants that contributed vaccinated  
223 person-weeks during the study period (n=36,109), the first vaccine dose was most often Comirnaty  
224 (41.5%). Other first vaccination products were Vaxzevria (33.7%), Spikevax (13.0%), Jcovden (9.9%),  
225 other (0.01%) or unknown (0.1%).

226 Participants had a median follow-up time of 27.7 person weeks. This was relatively short as  
227 participants were included over a period of 7 months and were censored after a reported SARS-CoV-  
228 2 test. During a total of 1,032,976 person-weeks of follow-up, 13,756 first SARS-CoV-2 infections  
229 were reported corresponding with an infection rate of 13.3 infections per 1,000 person-weeks.  
230 Reported positive tests were often a PCR-test (72.7%) or antigen-test (can be self-administered)  
231 (26.1%), with the share of antigen-tests increasing sharply during the Omicron period (**Additional file**  
232 **1, Figure S2**). The largest proportion of reported infections (12,129, 88.2%) occurred during the  
233 Omicron BA.1/BA.2 period (**Figure 1**). Infection rates were higher during person-weeks for  
234 unvaccinated compared to person-weeks for vaccinated (**Figure 1, Table 2**).

235

### 236 Vaccine effectiveness

237 Fully adjusted VE in the Delta period was estimated to be 80% (95%CI 69.3 – 87.0) <6 weeks after  
238 completing the primary series, counting from the start of the vaccination status not vaccine

239 administration (**Figure 2**). This decreased to 71% (95%CI 64.7 – 76.8) 19 – 24 weeks after completion  
240 of the primary vaccination series. VE increased again to 96% (95%CI 86.1 – 98.6) <6 weeks after the  
241 booster vaccination. VE estimates for the Omicron period were substantially lower compared to  
242 those in the Delta period. VE in the first 6 weeks after completing the primary vaccination series was  
243 estimated to be 46% (95%CI 21.7 – 62.7) and decreased to 25% (95%CI 7.7 – 39.1) 18-23 weeks after  
244 completion of the primary vaccination series. VE increased to 57% (95%CI 51.9 – 62.3) <6 weeks  
245 after booster vaccination and decreased to 31% (95%CI 16.6 – 43.5) at 18-23 weeks. For participants  
246 of 60 years and older, the VE against Omicron infection within 6 weeks after the second booster  
247 vaccination was 50% (95% CI 34.0 – 62.1) (**Figure 3; Additional file 1, Table S2**). Delta VE estimates  
248 of the models with and without having a medical risk condition (yes/no) as confounder were  
249 comparable (**Table 2**). VE estimates for Omicron were slightly lower when additionally adjusting for  
250 the presence of a medical risk condition.

251 VE estimates showed a similar pattern in the sensitivity analysis restricted to participants with a high  
252 intention to test in case of symptoms (n=26,520, median age = 61) except that VE estimates for  
253 Omicron infection were higher in this specific population (**Additional file 1, Figure S3**). The higher  
254 estimates in this sensitivity analysis were in line with a higher intention to test in vaccinated  
255 participants (**Additional file 1, Figure S4**).

256 In the sensitivity analysis restricted to participants who only received Comirnaty vaccine doses (as  
257 primary series and as booster(s) if booster(s) were received) (n=14,652 (39.8% of full analysis  
258 population), median age = 60), VE estimates for the Delta period were comparable to the VE  
259 estimates of the complete study population (**Additional file 1, Table S3**). VE against Delta infection  
260 decreased from 81% (95%CI 69.3 – 88.6) within 6 weeks after completion of primary series to 72%  
261 (95%CI 64.9 – 78.3) 18-23 weeks after completion and increased to 96% (95%CI 67.7 – 99.4) within 6  
262 weeks after booster vaccination. For the Omicron period, VE estimates for the booster vaccination  
263 were slightly but consistently lower in the Comirnaty subpopulation compared to the total study

264 population. VE decreased from 51% (95%CI 43.6 – 57.8) within 6 weeks after booster vaccination to  
265 11% (95%CI -27.0 – 36.9) 18-23 weeks after the booster. VE estimates stratified by vaccine product  
266 of the primary series and first booster vaccination are given in **Additional file 1, Table S5 and S6**.  
267 Generally, estimates were higher for Spikevax as primary series and lower for Vaxzevria and Jcovden  
268 compared with Comirnaty. For booster vaccination, estimates for Spikevax as booster were generally  
269 higher compared with Comirnaty as booster, irrespective of the vaccine product of the primary  
270 series.

271 For the Delta period, models with and without an interaction term between vaccination status and  
272 risk group did not differ significantly. For the Omicron period, the interaction term did significantly  
273 improve the model ( $p < 0.001$ ). The interaction term was significant between at least two risk groups  
274 for all periods after booster vaccination (**Additional file 1, Table S4**). When stratifying the model  
275 according to risk group, VE of booster vaccination in the Omicron period was lower among  
276 participants with a medical condition as compared to those without (**Figure 4**). Number of infections  
277 and person-weeks in unvaccinated persons with medical risk condition were relatively small,  
278 resulting in large confidence intervals around the VE.

279

## 280 **Discussion**

281 We evaluated the effectiveness of COVID-19 vaccines against Delta and Omicron BA.1/BA.2 SARS-  
282 CoV-2 infection in a real-world setting, overall and in four risk groups based on age and presence of  
283 medical risk condition. Compared to unvaccinated individuals, having completed the primary  
284 vaccination series was associated with protection against Delta and Omicron BA.1/BA.2 SARS-CoV-2  
285 infection. However, the protection against infection with the Omicron BA.1/BA.2 variants was  
286 markedly lower compared to protection against infection with the Delta variant. VE decreased over  
287 time after completing the primary vaccination series, but increased again after receiving a first  
288 booster vaccination, also in risk groups. In those aged 60 years and older, VE increased again after

289 receiving a second booster. VE of booster vaccinations also decreased over time since vaccination.  
290 Our data showed that unvaccinated participants had a lower intention to test if having symptoms  
291 compared to vaccinated participants. Indeed, when restricting our analysis to participants with high  
292 intention to test, VE against Omicron infection was higher. Despite large confidence intervals, VE  
293 against Omicron BA.1/BA.2 SARS-CoV-2 infection appeared lower among participants with a medical  
294 risk condition compared to participants without a medical risk condition, visible both in younger and  
295 older individuals. Our estimates concern effects of vaccination only, as prior infections were  
296 excluded.

297 Our study results are in line with national [7] and international surveillance data [12-15], showing a  
298 higher VE against Delta infection as compared to Omicron infection, resulting from considerable  
299 immune escape by the Omicron variant [16, 17]. Reported estimates for VE shortly after completion  
300 of a primary series range between 78% and 91% against Delta infection and 40% and 66% against  
301 Omicron infection are consistent with our findings of 80% and 46%, respectively. VE estimates of  
302 booster vaccination against Delta (96%) and Omicron infection (57%) were consistent with those  
303 found using surveillance data (86%-99% and 56%-72%, respectively) [7, 12-15]. Similar to our  
304 findings, other studies have shown waning of the effectiveness of both primary and booster  
305 vaccination [12-14]. Data on VE of second booster vaccination with unvaccinated as reference group  
306 is scarce. One preprint reported a VE against BA.2 infection in adults of 64% (95%CI 50.7 – 74.2) 14-  
307 30 days after fourth dose, which decreased to 51% (95%CI 35.5 – 63.0) 31-90 days after the fourth  
308 dose [18]. Our estimates were slightly lower (50% after 0-5 weeks and 16% after 6-11 weeks) but  
309 were based on data of adults aged 60 years and older only.

310 Only two other prospective cohort studies have reported VEs against Delta infection [19, 20]. In both  
311 studies, nose and/or throat swabs for PCR testing were regularly collected irrespective of having  
312 symptoms, allowing detection of symptomatic as well as asymptomatic infections. VE of Comirnaty  
313 (BioNTech/Pfizer) primary vaccination series in the Delta period reported in the ONS CIS study  
314 decreased from 85% at 14 days after second dose to 75% at 90 days [20]. Results of our sensitivity

315 analysis in participants who had only received Comirnaty vaccine doses were consistent with the  
316 ONS CIS Comirnaty estimates (81% at 0-5 weeks and 79% at 6-11 weeks after primary series). The VE  
317 estimate in the HEROES-RECOVER study was lower (66%, 95%CI 26-84), but time since vaccination  
318 was not taken into account and the study population consisted of health care workers only with  
319 likely high exposure [19]. The ONS CIS study further showed that VE of Vaxzevria (AstraZeneca)  
320 primary vaccination series was considerably lower than for Comirnaty (68% at 14 days and 61% at 90  
321 days), which was consistent with our results. Our results showed that VE of Comirnaty booster  
322 vaccination was lower as compared to VE of Spikevax booster vaccination. This is consistent with  
323 literature showing higher antibody levels after a Spikevax booster [21].

324 There is limited data on VE against infection in medical risk populations. One test-negative case-  
325 control study evaluated three-dose VE against infection in immunocompromised and  
326 immunocompetent individuals [13]. They found a significant interaction between  
327 immunocompromised status and vaccination status in both Delta and Omicron periods. In both  
328 periods, stratified analysis showed a lower VE in immunocompromised individuals (Delta: 70.6%,  
329 95%CI 31.0 – 87.5 ; Omicron: 29.4%, 95%CI 0.3 – 50.0) as compared to immunocompetent  
330 individuals (Delta: 93.7%, 95%CI 92.2 – 94.9; Omicron: 70.5%, 95% CI 68.6 – 72.4). Differences  
331 between the groups were larger than the differences we observed, yet our definition of medical risk  
332 was broader than immunocompromised individuals only. An Israeli historic cohort study showed  
333 lower VE of two doses against infection in both individuals with diabetes and cardiovascular disease  
334 (82%, 95% CI 62 – 92) and immunocompromised individuals (71%, 95% CI 37 – 87) as compared to  
335 overall (92%, 95%CI 83 – 96) [22]. Taking into account increased risk for severe COVID-19 outcomes  
336 [23], our results support the Dutch vaccination strategy to recommend booster vaccination for high  
337 risk groups.

338 This study has several strengths. In this cohort study we were able to adjust for (time-varying)  
339 confounders using extensive data from monthly questionnaires. Also, serological data enabled us to  
340 exclude participants with prior unreported SARS-CoV-2 infections. A recent study by Kahn et al

341 emphasized the added value of serological testing to exclude participants with prior infection [24].  
342 Also we were able to include self-administered antigen tests, freely available to participants, as  
343 outcome so we were not dependent on the testing infrastructure and we facilitated the use of self-  
344 tests by providing those to the participants. Further, the questionnaire on test behaviour allowed for  
345 an analysis restricted to participants with a consistently high intention to test in case of symptoms.  
346 Some limitations need to be discussed. Although the Cox proportional hazards models were adjusted  
347 for potential confounders, differences in (time-varying) factors between vaccinated and  
348 unvaccinated participants which may impact infection exposure can still confound the results. These  
349 include differences in test frequency and differences in exposure through behaviour or adherence to  
350 COVID-19 guidelines. Vaccinated individuals in our cohort had higher intention to test when  
351 symptoms occurred than unvaccinated individuals, possibly they are more health-conscious. Still,  
352 vaccination may have reduced testing if breakthrough infections are more often mild or  
353 asymptomatic. In other contexts, vaccinated individuals may test less frequently, if vaccination  
354 induces a sense of security and people are less worried, or if public health authorities request more  
355 frequent testing of unvaccinated individuals. From the start of the study period until the end of  
356 March 2022, when most COVID-19 interventions were lifted, use of the corona check app was in  
357 place, which for unvaccinated individuals required a negative PCR test, for example to enter  
358 restaurants and clubs. These behavioural factors might have resulted in either an underestimation or  
359 overestimation of the VE. Furthermore, vaccinated individuals may become more heavily exposed to  
360 the virus, if they feel more safe to attend (high-risk) exposure activities [25]. Even though it is  
361 suggested that there is little change in behaviour early after vaccination [26] and a recent study  
362 showed that differences in chance of SARS-CoV-2 exposure due to behaviour did not relevantly  
363 confound VE estimates in a test-negative setting [27], this phenomenon might decrease the benefit  
364 of vaccination [28].

365 Overall, our results show that VE was lower against Omicron infection than Delta infection, and both  
366 first and second booster vaccination increased waned effectiveness again, although the additional  
367 protection was rather short-lived. Importantly, this booster effect was also seen among risk groups  
368 but protection of vaccination against Omicron infection was consistently lower among risk groups.  
369 Thus, our data shows the benefit of booster vaccination in preventing SARS-CoV-2 infections, also in  
370 risk groups.

371

## 372 **Funding**

373 This work was supported by the Dutch ministry of Health.

374

## 375 **Conflicts of interests**

376 The authors declare that they have no competing interests.

377

## 378 **References**

- 379 1. Hahné S, Bollaerts K, Farrington P. Vaccination Programmes: Epidemiology, Monitoring,  
380 Evaluation. 1st ed: Routledge, **2021**.
- 381 2. Pluijmaekers A, de Melker H. The National Immunisation Programme in the Netherlands.  
382 Surveillance and developments in 2021-2022. Het Rijksvaccinatieprogramma in Nederland  
383 Surveillance en ontwikkelingen in 2021-2022: Rijksinstituut voor Volksgezondheid en Milieu  
384 RIVM, **2022**.
- 385 3. Valk A, van Meijeren D, Smorenburg N, et al. Vaccinatiegraad COVID-19 vaccinatie  
386 Nederland, 2021. COVID-19 vaccination coverage in the Netherlands in 2021: Rijksinstituut  
387 voor Volksgezondheid en Milieu RIVM, **2022**.



- 388 4. Rijksoverheid. Coronadashboard: De actuele situatie in Nederland. Available at:  
389 <https://coronadashboard.rijksoverheid.nl/>. Accessed 22 March 2022.
- 390 5. Rijksinstituut voor Volksgezondheid en Milieu. Archief wekelijkse update vaccinatiecijfers  
391 2022. Available at: [https://www.rivm.nl/covid-19-vaccinatie/archief-wekelijkse-update-](https://www.rivm.nl/covid-19-vaccinatie/archief-wekelijkse-update-vaccinatiecijfers-2022)  
392 [vaccinatiecijfers-2022](https://www.rivm.nl/covid-19-vaccinatie/archief-wekelijkse-update-vaccinatiecijfers-2022). Accessed 24 June 2022.
- 393 6. RIVM COVID-19 epidemiologie en surveillance team. Effectiviteit van COVID-19-vaccinatie  
394 tegen SARS-CoV-2 infectie in de Delta periode, **2021** 16 December 2021.
- 395 7. Andeweg SP, de Gier B, Eggink D, et al. Protection of COVID-19 vaccination and previous  
396 infection against Omicron BA.1, BA.2 and Delta SARS-CoV-2 infections. *Nat Commun* **2022**;  
397 13(1): 4738.
- 398 8. de Gier B, Andeweg S, Joosten R, et al. Vaccine effectiveness against SARS-CoV-2  
399 transmission and infections among household and other close contacts of confirmed cases,  
400 the Netherlands, February to May 2021. *Euro Surveill* **2021**; 26(31).
- 401 9. de Gier B, Andeweg S, Backer JA, et al. Vaccine effectiveness against SARS-CoV-2  
402 transmission to household contacts during dominance of Delta variant (B.1.617.2), the  
403 Netherlands, August to September 2021. *Euro Surveill* **2021**; 26(44).
- 404 10. Huiberts A, Kooijman M, Melker H, et al. Design and baseline description of an observational  
405 population-based cohort study on COVID-19 vaccine effectiveness in the Netherlands - The  
406 VAccine Study COvid-19 (VASCO). **2022**.
- 407 11. Rijksinstituut voor Volksgezondheid en Milieu. Varianten van het coronavirus SARS-CoV-2.  
408 Available at: <https://www.rivm.nl/coronavirus-covid-19/virus/varianten>. Accessed 29 July  
409 2022.
- 410 12. Suarez Castillo M, Khaoua H, Courtejoie N. Vaccine-induced and naturally-acquired  
411 protection against Omicron and Delta symptomatic infection and severe COVID-19  
412 outcomes, France, December 2021 to January 2022. *Eurosurveillance* **2022**; 27(16): 2200250.

- 413 13. Tseng HF, Ackerson BK, Luo Y, et al. Effectiveness of mRNA-1273 against SARS-CoV-2  
414 Omicron and Delta variants. *Nat Med* **2022**; 28(5): 1063-71.
- 415 14. Andrews N, Stowe J, Kirsebom F, et al. Covid-19 Vaccine Effectiveness against the Omicron  
416 (B.1.1.529) Variant. *N Engl J Med* **2022**; 386(16): 1532-46.
- 417 15. Gram MA, Emborg H-D, Schelde AB, et al. Vaccine effectiveness against SARS-CoV-2 infection  
418 and COVID-19-related hospitalization with the Alpha, Delta and Omicron SARS-CoV-2  
419 variants: a nationwide Danish cohort study. *medRxiv* **2022**: 2022.04.20.22274061.
- 420 16. Yu J, Collier A-rY, Rowe M, et al. Neutralization of the SARS-CoV-2 Omicron BA.1 and BA.2  
421 Variants. *New England Journal of Medicine* **2022**; 386(16): 1579-80.
- 422 17. Netzl A, Tureli S, LeGresley E, Mühlemann B, Wilks SH, Smith DJ. Analysis of SARS-CoV-2  
423 Omicron Neutralization Data up to 2021-12-22. *bioRxiv* **2022**: 2021.12.31.474032.
- 424 18. Tseng HF, Ackerson BK, Bruxvoort KJ, et al. Effectiveness of mRNA-1273 against infection and  
425 COVID-19 hospitalization with SARS-CoV-2 Omicron subvariants: BA.1, BA.2, BA.2.12.1, BA.4,  
426 and BA.5. *medRxiv* **2022**: 2022.09.30.22280573.
- 427 19. Fowlkes A, Gaglani M, Groover K, Thiese MS, Tyner H, Ellingson K. Effectiveness of COVID-19  
428 Vaccines in Preventing SARS-CoV-2 Infection Among Frontline Workers Before and During  
429 B.1.617.2 (Delta) Variant Predominance — Eight U.S. Locations, December 2020–August  
430 2021. *MMWR Morb Mortal Wkly Rep* **2021**; 70: 1167-9.
- 431 20. Pouwels KB, Pritchard E, Matthews PC, et al. Effect of Delta variant on viral burden and  
432 vaccine effectiveness against new SARS-CoV-2 infections in the UK. *Nat Med* **2021**; 27(12):  
433 2127-35.
- 434 21. Wei J, Matthews PC, Stoesser N, et al. Correlates of protection against SARS-CoV-2 Omicron  
435 variant and anti-spike antibody responses after a third/booster vaccination or breakthrough  
436 infection in the UK general population. *medRxiv* **2022**: 2022.11.29.22282916.
- 437 22. Chodick G, Tene L, Rotem RS, et al. The Effectiveness of the Two-Dose BNT162b2 Vaccine:  
438 Analysis of Real-World Data. *Clin Infect Dis* **2022**; 74(3): 472-8.

- 439 23. Williamson EJ, Walker AJ, Bhaskaran K, et al. Factors associated with COVID-19-related death  
440 using OpenSAFELY. *Nature* **2020**; 584(7821): 430-6.
- 441 24. Kahn R, Schrag SJ, Verani JR, Lipsitch M. Identifying and Alleviating Bias Due to Differential  
442 Depletion of Susceptible People in Postmarketing Evaluations of COVID-19 Vaccines. *Am J*  
443 *Epidemiol* **2022**; 191(5): 800-11.
- 444 25. Ioannidis JPA. Factors influencing estimated effectiveness of COVID-19 vaccines in non-  
445 randomised studies. *BMJ Evidence-Based Medicine* **2022**: bmjebm-2021-111901.
- 446 26. Goldszmidt R, Petherick A, Andrade EB, et al. Protective Behaviors Against COVID-19 by  
447 Individual Vaccination Status in 12 Countries During the Pandemic. *JAMA Network Open*  
448 **2021**; 4(10): e2131137-e.
- 449 27. van Ewijk CE, Kooijman MN, Fanoy E, et al. COVID-19 vaccine effectiveness against SARS-  
450 CoV-2 infection during the Delta period, a nationwide study adjusting for chance of  
451 exposure, the Netherlands, July to December 2021. *Euro Surveill* **2022**; 27(45).
- 452 28. Ioannidis JPA. Benefit of COVID-19 vaccination accounting for potential risk compensation.  
453 *npj Vaccines* **2021**; 6(1): 99.
- 454

455 **Tables**

456 **Table 1.** Baseline characteristics of participants included in analysis

|                                                           | <b>Total</b><br><b>(n=36,816)</b> | <b>18-59 years</b><br><b>(n=16,575)</b> | <b>60-85 years</b><br><b>(n=20,241)</b> |
|-----------------------------------------------------------|-----------------------------------|-----------------------------------------|-----------------------------------------|
| Sex (%)                                                   |                                   |                                         |                                         |
| Male                                                      | 13,874 (37.7)                     | 4,633 (28.0)                            | 9,241 (45.7)                            |
| Female                                                    | 22,922 (62.3)                     | 11,923 (71.9)                           | 10,999 (54.3)                           |
| Other                                                     | 20 (0.1)                          | 19 (0.1)                                | 1 (0.0)                                 |
| Median age (years; IQR)                                   | 61 (15)                           | 48 (17)                                 | 65 (7)                                  |
| Medical risk condition <sup>a</sup> at inclusion, yes (%) | 11,078 (30.1)                     | 3,307 (20.0)                            | 7,771 (38.4)                            |
| Cardiovascular disease                                    | 6,612 (18.0)                      | 1,322 (8.0)                             | 5,290 (26.1)                            |
| Lung disease or asthma                                    | 2,852 (7.7)                       | 1,289 (7.8)                             | 1,563 (7.7)                             |
| Diabetes mellitus                                         | 1,820 (4.9)                       | 393 (2.4)                               | 1,427 (7.1)                             |
| Immune deficiency                                         | 697 (1.9)                         | 336 (2.0)                               | 361 (1.8)                               |
| Educational level <sup>b</sup> (%)                        |                                   |                                         |                                         |
| Low                                                       | 5,151 (14.0)                      | 1,105 (6.7)                             | 4,046 (20.0)                            |
| Intermediate                                              | 10,328 (28.1)                     | 4,976 (30.0)                            | 5,352 (26.4)                            |
| High                                                      | 21,119 (57.4)                     | 10,441 (63.0)                           | 10,678 (52.8)                           |
| Other                                                     | 218 (0.6)                         | 53 (0.3)                                | 165 (0.8)                               |

457 <sup>a</sup> Medical risk condition: one or more of following conditions: diabetes mellitus, lung disease or asthma,  
458 asplenia, cardiovascular disease, immune deficiency, cancer (currently untreated, currently treated,  
459 untreated), liver disease, neurological disease, renal disease, organ or bone marrow transplantation. Four  
460 most frequent conditions are presented here.

461 <sup>b</sup> Educational level was classified as low (no education or primary education), intermediate (secondary school  
462 or vocational training), or high (bachelor's degree, university).

463 **Table 2.** Vaccine effectiveness per vaccination status stratified by Delta and Omicron BA.1/BA.2

464 period from 12 July 2021 to 6 June 2022

|                                     | Number of<br>infections | Person-<br>weeks | Rate (per<br>1,000<br>weeks) | Adjusted <sup>a</sup> VE<br>(95% CI) | Adjusted <sup>b</sup> VE<br>(95% CI) |
|-------------------------------------|-------------------------|------------------|------------------------------|--------------------------------------|--------------------------------------|
| (All)                               | 13,756                  | 1,032,976        | 13.3                         |                                      |                                      |
| <i>Delta period</i>                 |                         |                  |                              |                                      |                                      |
| Unvaccinated                        | 126                     | 10,500           | 12.0                         | Ref.                                 | Ref.                                 |
| Primary series (0-5 weeks)          | 48                      | 74,553           | 0.6                          | 80.0 (69.3-87)                       | 80.0 (69.3-87)                       |
| Primary series (6-11 weeks)         | 79                      | 105,993          | 0.7                          | 80.5 (73.6-85.6)                     | 80.5 (73.6-85.5)                     |
| Primary series (12-17 weeks)        | 338                     | 110,942          | 3.0                          | 71.5 (65.0-76.8)                     | 71.4 (64.9-76.8)                     |
| Primary series (18-23 weeks)        | 416                     | 92,285           | 4.5                          | 71.5 (64.8-76.9)                     | 71.4 (64.7-76.8)                     |
| Booster 1 vaccination (0-5 weeks)   | 3                       | 4,328            | 0.7                          | 95.6 (86.2-98.6)                     | 95.6 (86.1-98.6)                     |
| <i>Omicron BA.1/BA.2 period</i>     |                         |                  |                              |                                      |                                      |
| Unvaccinated                        | 301                     | 5,876            | 51.2                         | Ref.                                 | Ref.                                 |
| Primary series (0-5 weeks)          | 31                      | 1,192            | 26.0                         | 46.3 (22.2-62.9)                     | 45.9 (21.7-62.7)                     |
| Primary series (6-11 weeks)         | 62                      | 1,910            | 32.5                         | 49.0 (33.0-61.2)                     | 48.2 (31.9-60.6)                     |
| Primary series (12-17 weeks)        | 72                      | 2,162            | 33.3                         | 45.7 (29.8-58.1)                     | 44.0 (27.5-56.7)                     |
| Primary series (18-23 weeks)        | 129                     | 3,930            | 32.8                         | 25.9 (8.8-39.8)                      | 25.0 (7.7-39.1)                      |
| Booster 1 vaccination (0-5 weeks)   | 3,011                   | 156,474          | 19.2                         | 57.7 (52.3-62.6)                     | 57.4 (51.9-62.3)                     |
| Booster 1 vaccination (6-11 weeks)  | 5,499                   | 151,040          | 36.4                         | 49.1 (42.7-54.8)                     | 48.7 (42.3-54.4)                     |
| Booster 1 vaccination (12-17 weeks) | 1,820                   | 97,892           | 18.6                         | 39.4 (31.1-46.8)                     | 39.0 (30.5-46.4)                     |
| Booster 1 vaccination (18-23 weeks) | 356                     | 44,274           | 8.0                          | 31.9 (17.3-44.0)                     | 31.4 (16.6-43.5)                     |

465 <sup>a</sup> Adjusted for age group, sex, educational level.

466 <sup>b</sup> Adjusted for age group, sex, educational level, medical condition.

467

468 **Figures**

469 **Figure 1.** 7-days moving average of number of infections reported per 100,000 VASCO participants

470 by vaccination status from 12 July 2021 to 6 June 2022

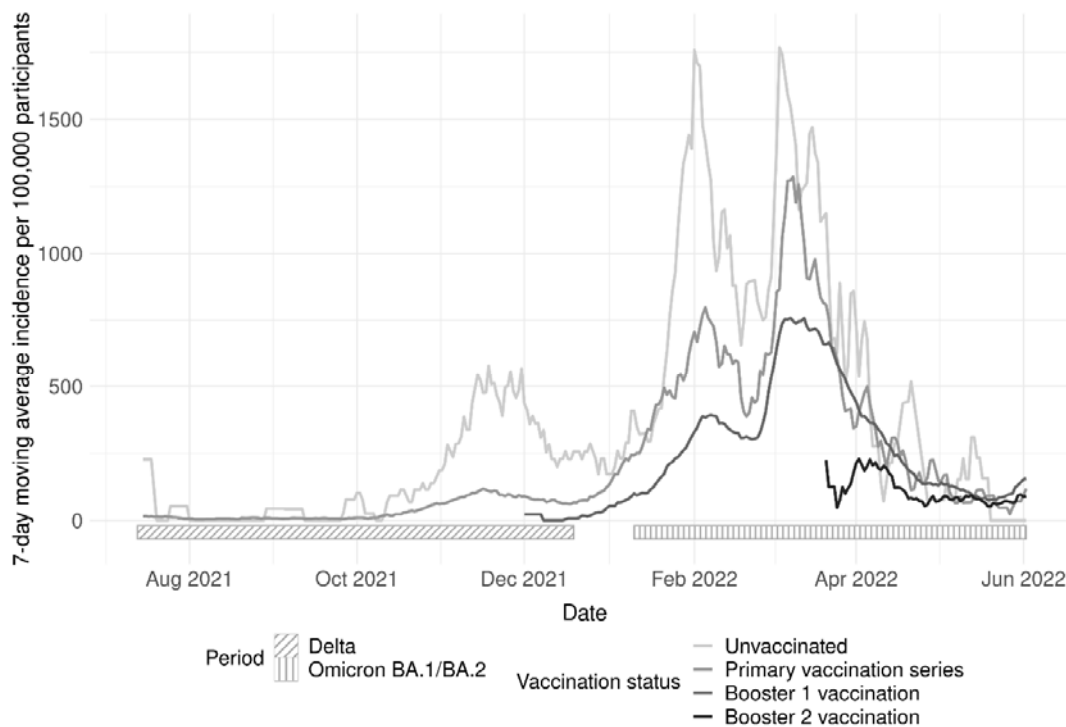

471

472 **Figure 2.** Vaccine effectiveness<sup>a</sup> for primary vaccination series and first booster vaccination in Delta

473 and Omicron BA.1/BA.2 period from 12 July 2021 to 6 June 2022

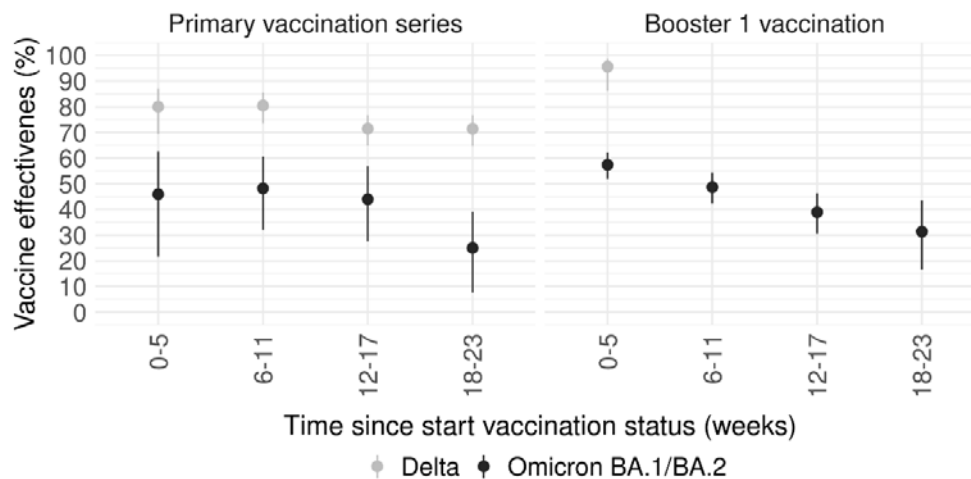

474

475 <sup>a</sup> Adjusted for age group, sex, educational level, medical condition.

476 **Figure 3.** Vaccine effectiveness<sup>a</sup> for primary vaccination series, first booster and second booster  
 477 vaccination in Delta and Omicron BA.1/BA.2 period in participants aged ≥ 60 years from 12 July 2021  
 478 to 6 June 2022

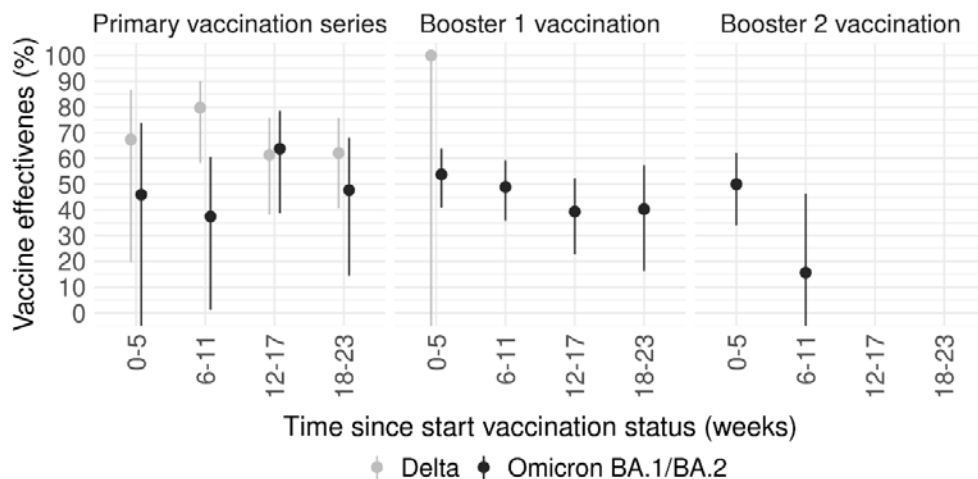

479

480 <sup>a</sup> VE was not reported when number of person-weeks <500; Adjusted for age group, sex, educational level,  
 481 medical condition.

482 **Figure 4.** Vaccine effectiveness<sup>a</sup> for primary vaccination series, booster and second booster  
 483 vaccination per risk group in the Omicron BA.1/BA.2 period from 10 January 2022 to 6 June 2022

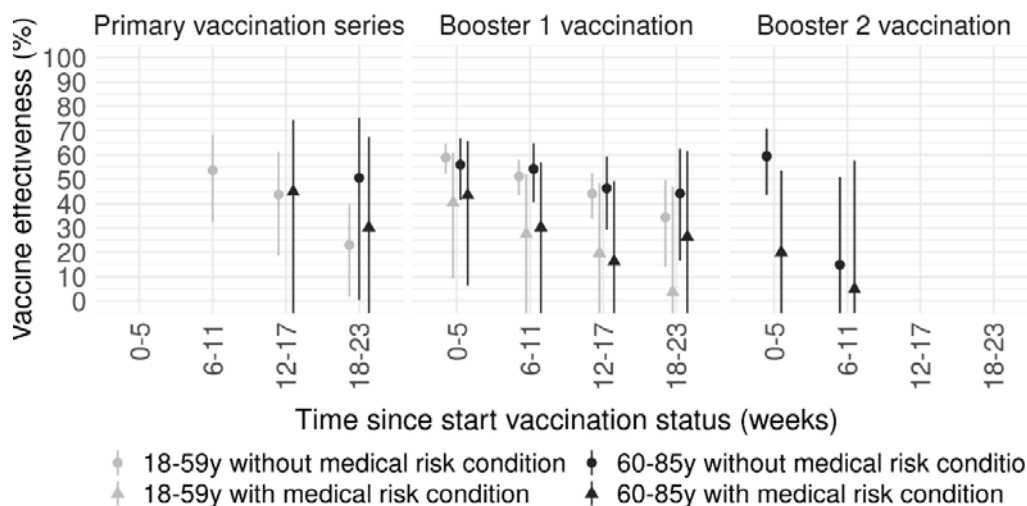

484

485 <sup>a</sup> VE was not reported when number of person-weeks <500; Adjusted for age group, sex, educational level.

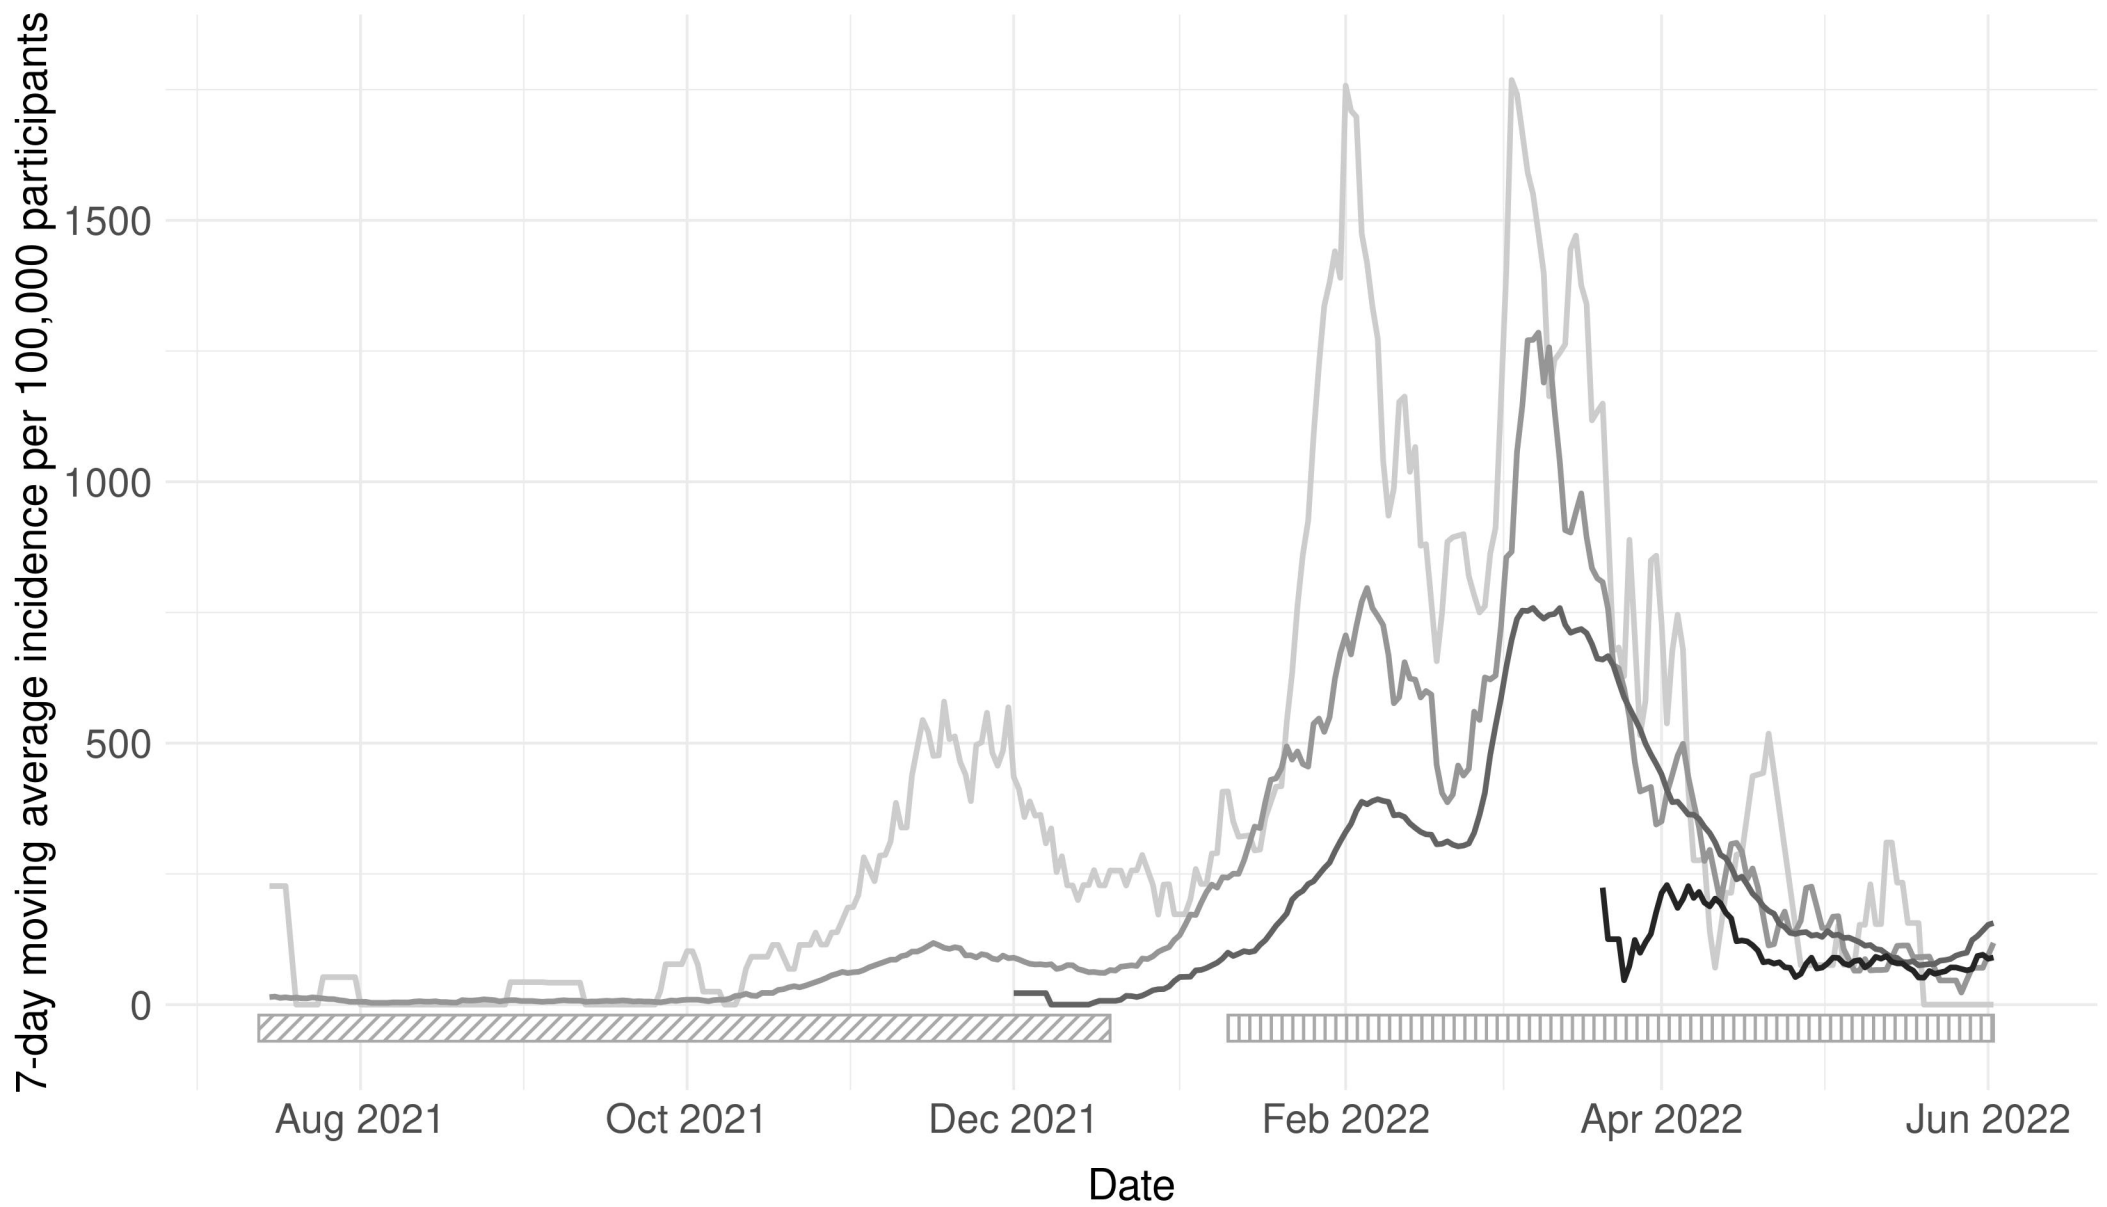

Period

-  Delta
-  Omicron BA.1/BA.2

Vaccination status

-  Unvaccinated
-  Primary vaccination series
-  Booster 1 vaccination
-  Booster 2 vaccination



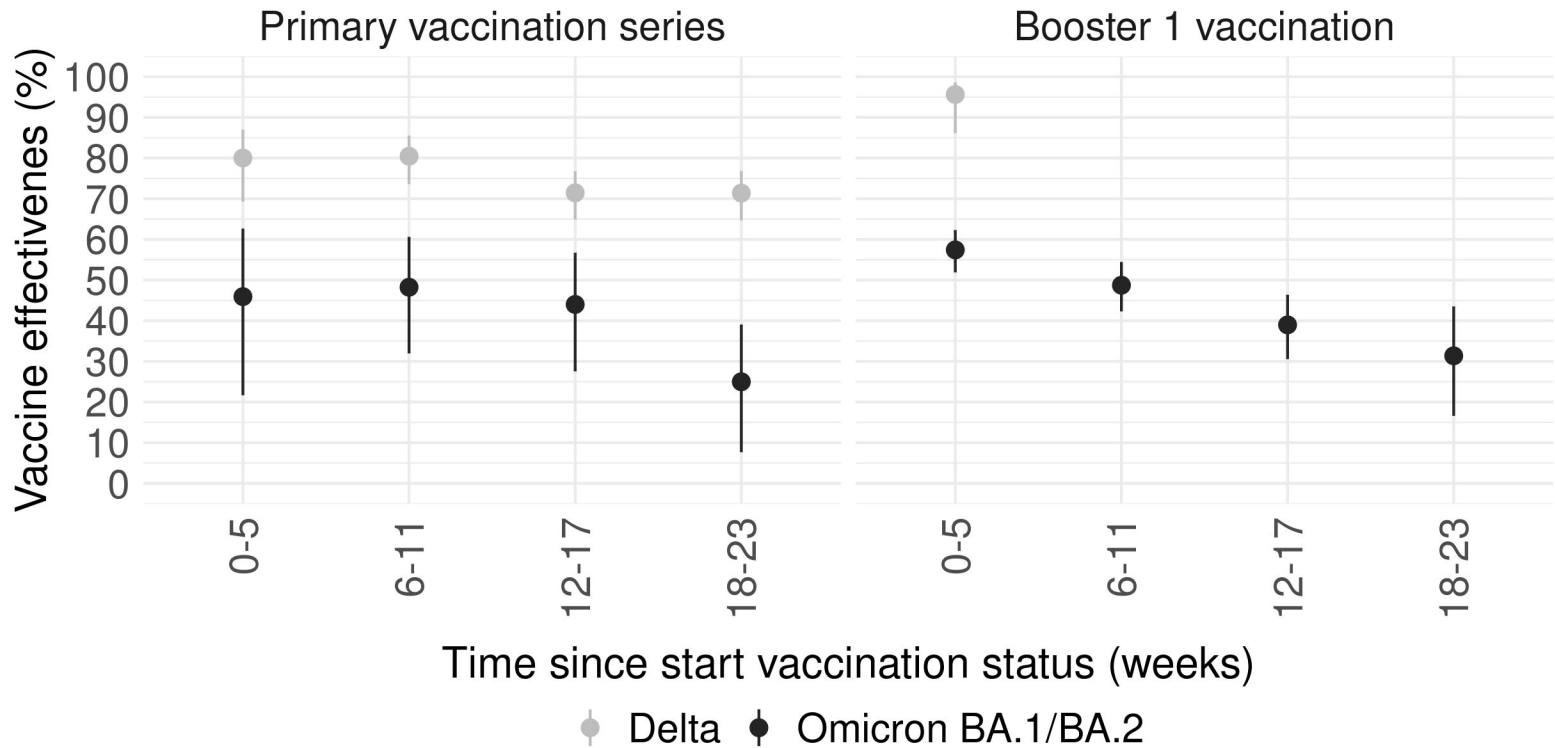

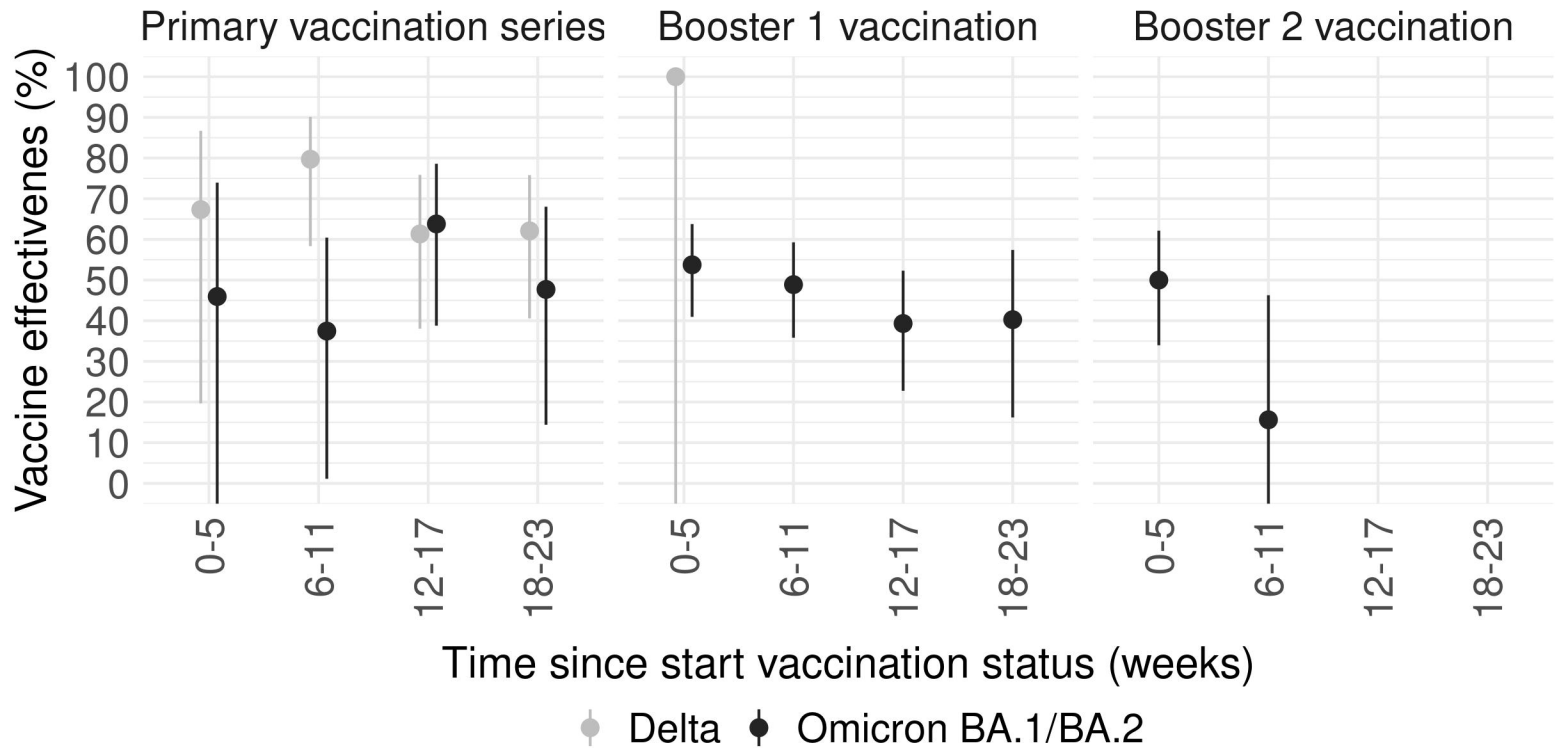

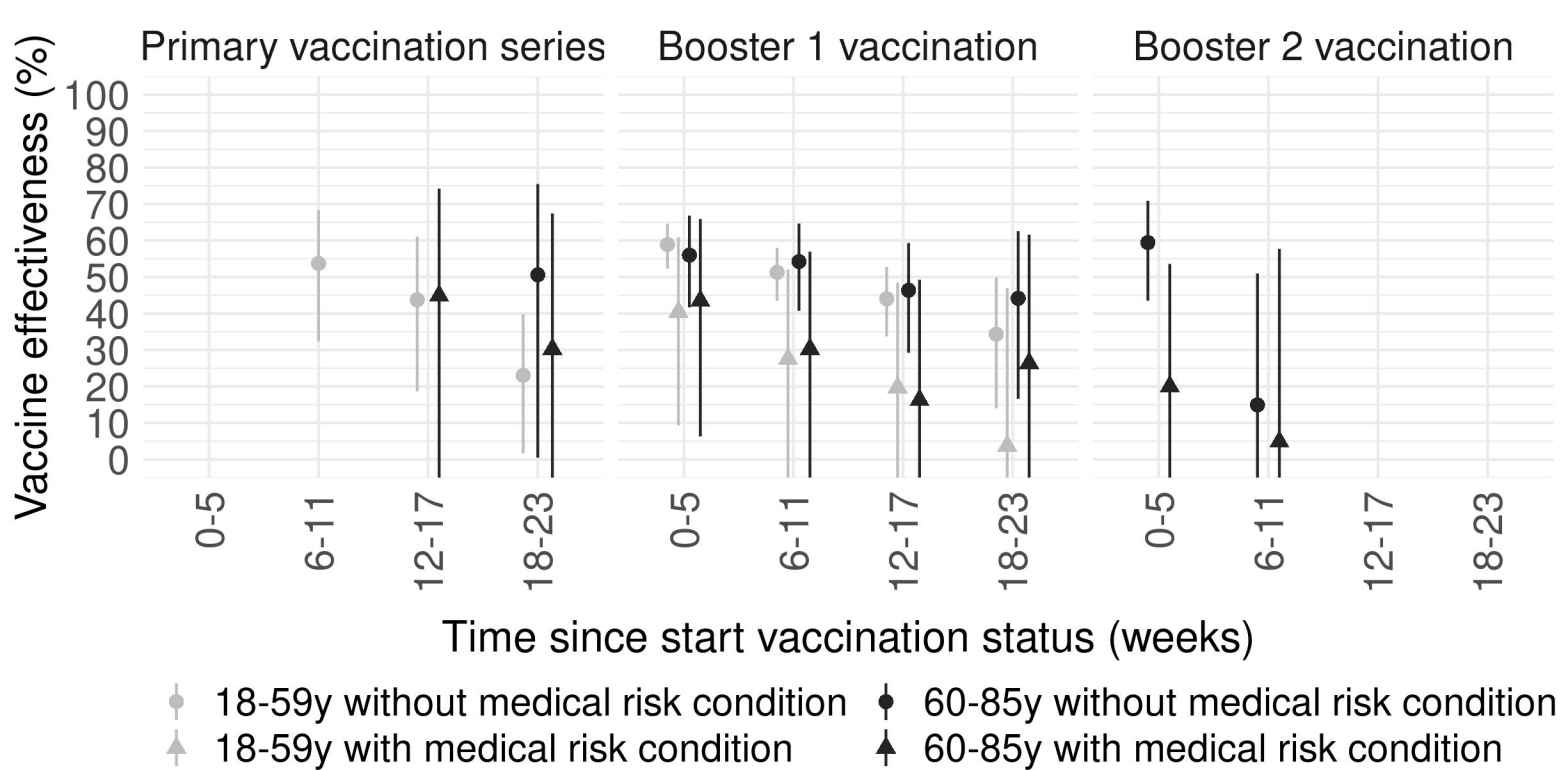

Source: https://medrxiv.org/content/10.1101/2023.01.09.23284335v1.full.pdf
